# Supplementary material for: Inflammatory mimetic microfluidic chip by immobilization of cell adhesion molecules for T cell adhesion
Source: Royal Society of Chemistry journal article supplement (doi:10.1039/c2an35424a), 2012-01-01
Supplement: c2an35424a.pdf [file c2an35424a.pdf]

Cite this: DOI: 10.1039/c0xx00000x

www.rsc.org/xxxxxx

ARTICLE TYPE

## Inflammatory Mimetic Microfluidic Chip by Immobilization of Cell Adhesion Molecules for T Cell Adhesion

Sung Kyu Kim<sup>‡</sup>, Won Kang Moon<sup>‡</sup>, Joo Young Park and Hyungil Jung\*

Received (in XXX, XXX) Xth XXXXXXXXXX 20XX, Accepted Xth XXXXXXXXXX 20XX

DOI: 10.1039/b000000x

---

\* Department of Biotechnology, Yonsei University, 50 Yonsei-ro, Seodaemun-gu, Seoul, Korea.

Fax: + 82-2-362-7265; Tel: + 82-2-2123-2884; E-mail: [hijung@yonsei.ac.kr](mailto:hijung@yonsei.ac.kr)

‡ W.K. Moon and S.K. Kim are equally contributing first authors.

Cite this: DOI: 10.1039/c0xx00000x

www.rsc.org/xxxxxx

ARTICLE TYPE

### Fluorescence detection of adhesion molecules in microfluidic channel

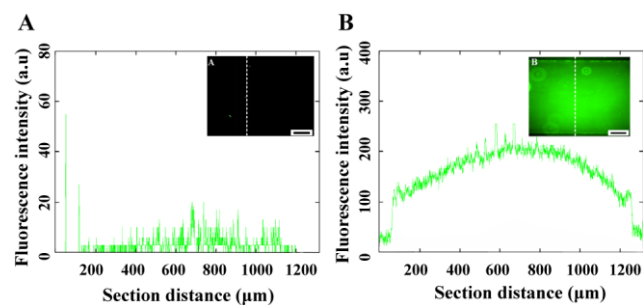

**Figure S1. Fluorescence detection of immobilized E-selectin in the microfluidic channel.** FITC-conjugated anti-E-selectin-antibody was infused at (A) E-selectin non-immobilized and (B) E-selectin immobilized microfluidic channel. Fluorescence intensity was measured at cross section of dashed line above. E-selectin was immobilized at the density of 25µM. Anti-E-selectin-antibody was infused with the condition of 5 µg/mL, 3 dyne/cm<sup>2</sup>. Scale bar is 200 µm.
